# Supplementary material for: Doping stimulated ferromagnetic ordering and tailoring of the dielectric properties of Ba1−xCexTiO3
Source: Royal Society of Chemistry journal article supplement (doi:10.1039/d4ma00593g), 2024-01-01
Supplement: d4ma00593g1.pdf [file d4ma00593g1.pdf]

# Doping Stimulated Ferromagnetic Ordering and Tailoring Dielectric Properties of $\text{Ba}_{1-x}\text{Ce}_x\text{TiO}_3$

Rahul Sharma<sup>1,2</sup>, Shreya Sinha<sup>2</sup>, Rahul Singh<sup>2</sup>, Saurabh Pathak<sup>3\*</sup>, Barsha Borgohain<sup>4</sup>, Noorjahan<sup>2\*</sup>, N. S. Negi<sup>1</sup>

<sup>1</sup>Department of Physics, Himachal Pradesh University, Summer Hill, Shimla-171005 India

<sup>2</sup>Department of Physics and Astronomical Science, Central University of Himachal Pradesh, Dharamshala-176215 India

<sup>3</sup>National Creative Research Center for Spin Dynamics and SW devices, Department of Material Sciences and Engineering, Seoul National University, Seoul 151-744, South Korea

<sup>4</sup>Department of Physics, Darrang College, Tezpur Assam

Corresponding Authors; [saurabh.pathak28@gmail.com](mailto:saurabh.pathak28@gmail.com), [noor.jahan@hpcu.ac.in](mailto:noor.jahan@hpcu.ac.in)

## Supplementary Data

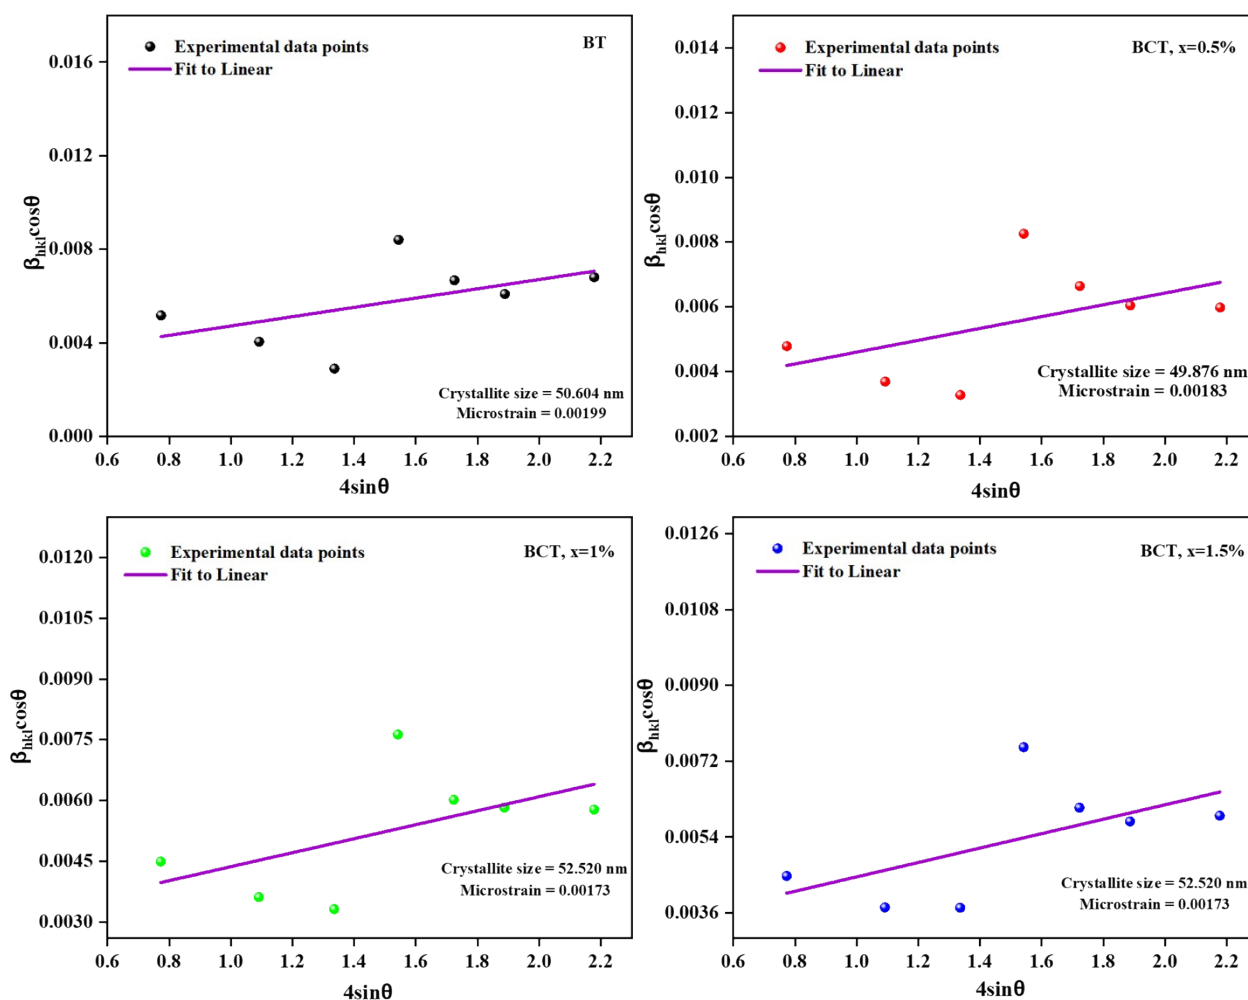

**Figure S1:** Williamson Hall plots of BT and BCT ceramics for different doping concentrations of Cerium.

The strain values obtained for each sample is as below.

| <b>Sample name</b>  | <b>Strain values</b> |
|---------------------|----------------------|
| <b>BT</b>           | <b>0.56519</b>       |
| <b>BCT, Ce=0.5%</b> | <b>0.74035</b>       |
| <b>BCT, Ce=1%</b>   | <b>0.76219</b>       |
| <b>BCT, Ce=1.5%</b> | <b>0.72903</b>       |
